# Supplementary material for: High-purity polypropylene from disposable face masks via solvent-targeted recovery and precipitation
Source: Royal Society of Chemistry journal article supplement (doi:10.1039/d3gc00205e), 2023-01-01
Supplement: d3gc00205e1.pdf [file d3gc00205e1.pdf]

## Supporting Information

### High-purity Polypropylene from Disposable Face Masks via Solvent-Targeted Recovery and Precipitation

Jiuling Yu<sup>a</sup>, Aurora del Carmen Munguía-López<sup>a</sup>, Victor S. Cecon<sup>b,c</sup>, Kevin L. Sánchez-Rivera<sup>a</sup>, Kevin Nelson<sup>d</sup>, Jiayang Wu<sup>a</sup>, Shreyas Kolapkar<sup>e</sup>, Victor M. Zavala<sup>a</sup>, Greg W. Curtzwiler<sup>b,c</sup>, Keith L. Vorst<sup>b,c</sup>, Ezra Bar-Ziv<sup>e</sup>, George W. Huber<sup>a\*</sup>

<sup>a</sup> Department of Chemical and Biological Engineering, University of Wisconsin-Madison, Madison, WI, 53706, USA

<sup>b</sup> Polymer and Food Protection Consortium, Iowa State University, Ames, IA, 50011, USA

<sup>c</sup> Department of Food Science and Human Nutrition, Iowa State University, Ames, IA, 50011, USA

<sup>d</sup> Amcor, Neenah Innovation Center, Neenah, WI, 54956, USA

<sup>e</sup> Department of Mechanical Engineering-Engineering Mechanics, Michigan Technological University, Houghton, MI, 49931, USA

#### **Supporting information includes:**

- Figure S1. (a) PP recovery yields and (b) undissolved solid residue yields at different temperatures for new and used masks. All experiments were operated for 5 mins.
- Figure S2. Overall yields based on different dissolution time conditions for new and used masks. All experiments were operated at 110°C.
- Figure S3. ATR-FTIR spectra of the STRAP residue at different dissolution time conditions from (a) new mask and (b) used mask.
- Figure S4. (a) <sup>1</sup>H NMR spectra and (b) <sup>13</sup>C NMR spectra of virgin PP and decolored PP in 1,1,2,2-tetrachloroethane-*d*<sub>2</sub>.
- Table S1. Yields of STRAP residue from new and used mask.
- Table S2. Detailed color quantification results for ground PP without and with decolorization process, using virgin PP as a control sample (70 μm films). Each sample was tested for 4 times.

#### **Economic impacts of the STRAP process including color removal:**

- Figure S5. ATR-FTIR spectra of (a) fresh toluene and recycled toluene from stream No.13 and (b) fresh DMAc and distilled DMAc from stream No.26.
- Figure S6. HPLC analysis of (a) fresh toluene, (b) and recycled toluene from stream No.13, (c) fresh DMAc, and (d) distilled DMAc from stream No.26.
- Figure S7. GC-MS spectra of (a) fresh toluene and recycled toluene from stream No.13 and (b) fresh DMAc and distilled DMAc from stream No.26.
- Figure S8. Process flow diagram for the recovery of decolored PP in face masks using the STRAP technology. The numbers in each line denote the stream number.
- Table S3. General parameters for the technoeconomic analysis.
- Table S4. Installed equipment cost for a 5,292 ton/year plant to produce decolored PP from face masks.

- Table S5. Capital cost (CAPEX) for a 5,292 ton/year plant to produce decolored PP from face masks.
- Table S6. Fixed operating cost for a 5,292 ton/year plant to produce decolored PP from face masks.
- Table S7. Variable operating costs for a 5,292 ton/year plant to produce decolored PP from face masks.
- Table S8. Revenue for a 5,292 ton/year plant to produce decolored PP from face masks.
- Table S9. Stream list and mass balance for a 5,292 ton/year decolored PP plant.

**Economic and environmental impacts of the STRAP process without color removal:**

- Figure S9. Process flow diagram for the recovery of colored PP in face masks using the STRAP technology (without color removal process).
- Figure S10. Sensitivity analysis for important parameters of the process without color removal.
- Figure S11. Sensitivity analysis for economies of scale of the STRAP process without color removal.
- Figure S12. Climate change impact of producing colored PP via the STRAP process in comparison with virgin PP.
- Table S10. Installed equipment cost for a 5,292 ton/year plant to produce colored PP from face masks.
- Table S11. Capital cost (CAPEX) for a 5,292 ton/year plant to produce colored PP from face masks.
- Table S12. Fixed operating cost for a 5,292 ton/year plant to produce colored PP from face masks.
- Table S13. Variable operating costs for a 5,292 ton/year plant to produce colored PP from face masks.
- Table S14. Revenue for a 5,292 ton/year plant to produce colored PP from face masks. We assume that the selling price will be lower than the price of the decolored PP.

**References**

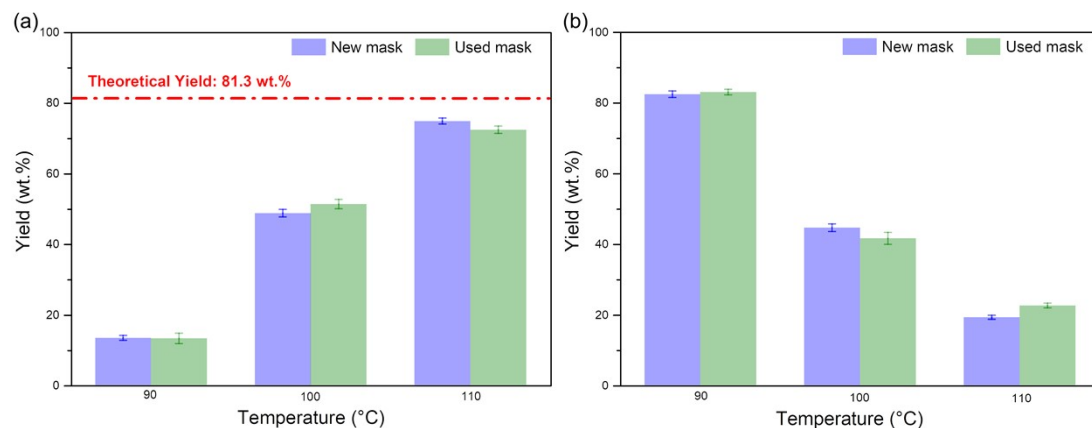

Figure S1. (a) PP recovery yields and (b) undissolved solid residue yields at different temperatures for new and used masks. All experiments were operated for 5 mins.

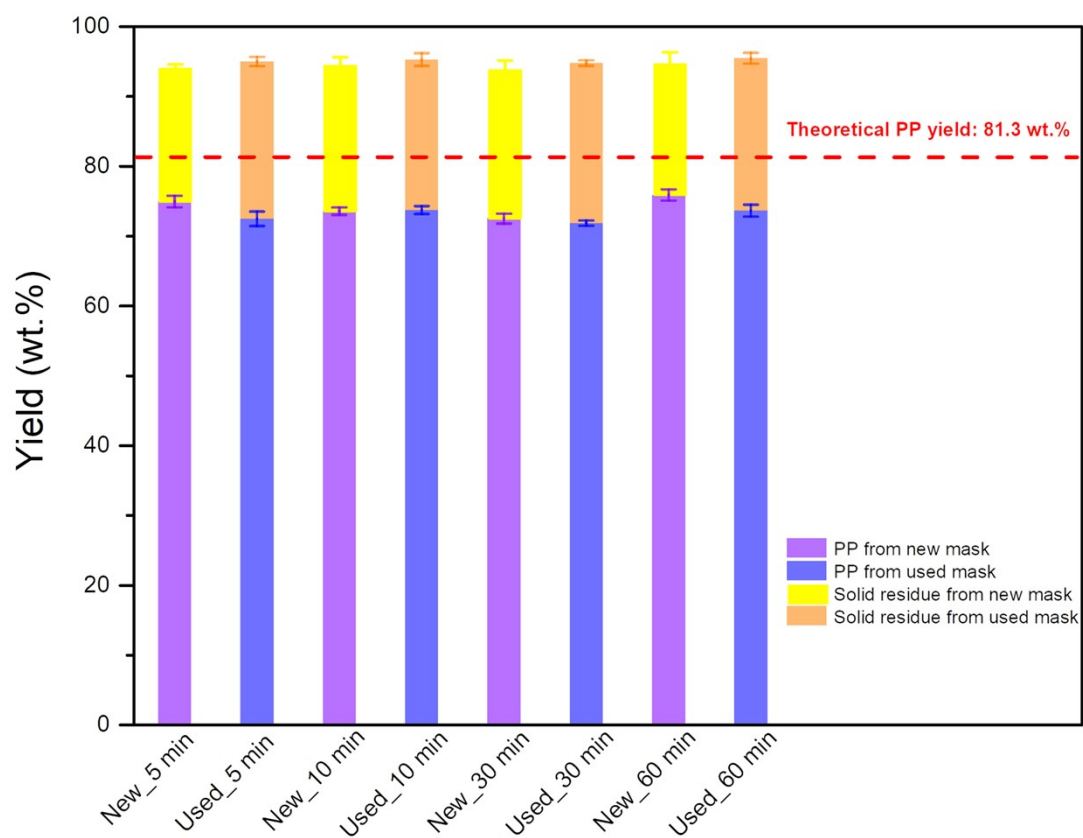

Figure S2. Overall yields based on different dissolution time conditions for new and used masks. All experiments were operated at 110°C.

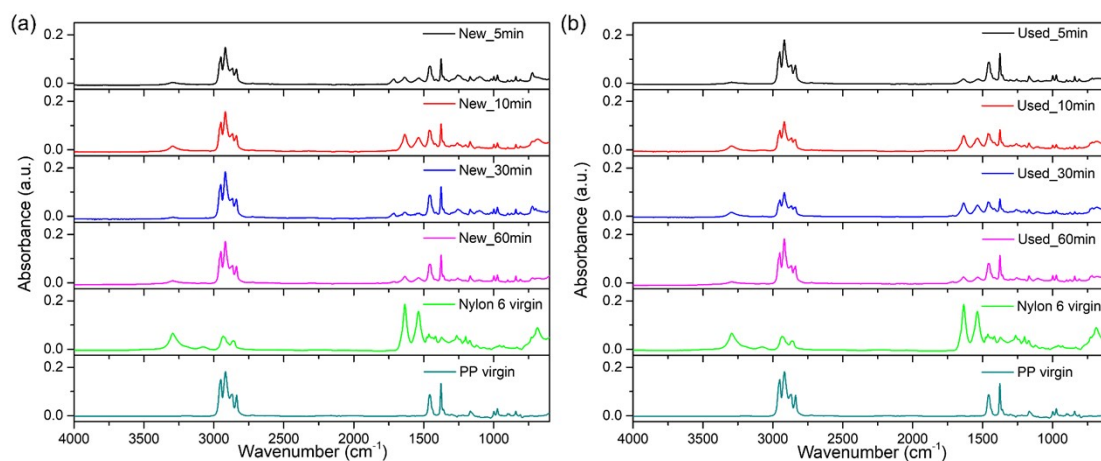

Figure S3. ATR-FTIR spectra of the STRAP residue at different dissolution time conditions from (a) new mask and (b) used mask.

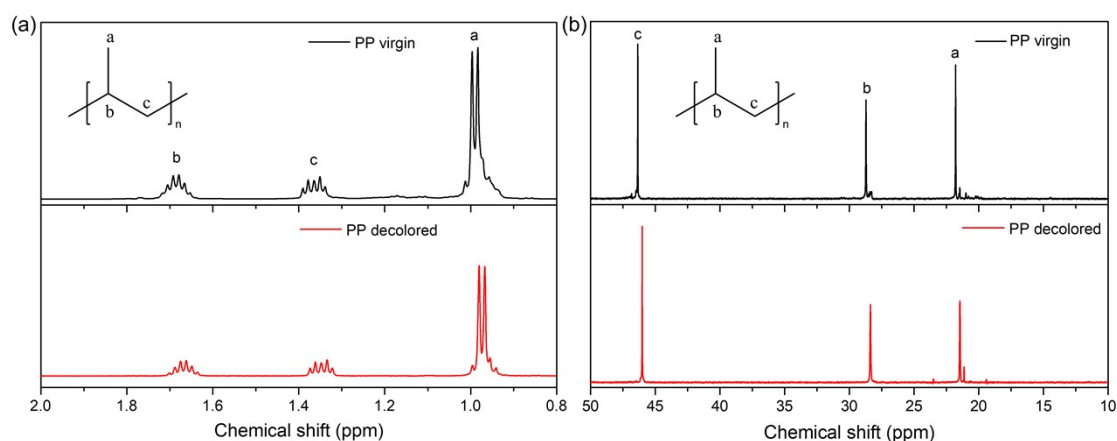

Figure S4. (a)  $^1\text{H}$  NMR spectra and (b)  $^{13}\text{C}$  NMR spectra of virgin PP and decolored PP in 1,1,2,2-tetrachloroethane- $d_2$ .

Table S1. Yields of STRAP residue from new and used mask.

| Dissolution time (min) | New mask<br>STRAP residue yield (%) | Used mask<br>STRAP residue yield (%) |
|------------------------|-------------------------------------|--------------------------------------|
| 5                      | 19.23 ± 0.55 <sup>a</sup>           | 22.56 ± 0.67 <sup>a</sup>            |
| 10                     | 21.06 ± 1.11 <sup>a</sup>           | 21.57 ± 0.91 <sup>a</sup>            |
| 30                     | 21.45 ± 1.32 <sup>a</sup>           | 22.94 ± 0.39 <sup>a</sup>            |
| 60                     | 18.94 ± 1.59 <sup>a</sup>           | 21.87 ± 0.77 <sup>a</sup>            |

Same letter in the same column indicates statistical insignificance by Duncan's multiple range test.

Table S2. Detailed color quantification results for ground PP without and with decolorization process, using virgin PP as a control sample (70  $\mu\text{m}$  films). Each sample was tested for 4 times.

| Name                    | Number | Perceived lightness | Red/green balance | Yellow/blue balance | Yellowness Index |
|-------------------------|--------|---------------------|-------------------|---------------------|------------------|
|                         |        | L*                  | a*                | b*                  | YI               |
| Virgin PP               | 1      | 95.93               | 1.75              | -6.7                | -11.19           |
|                         | 2      | 96.38               | 1.90              | -7.34               | -12.22           |
|                         | 3      | 96.18               | 1.84              | -7.15               | -11.94           |
|                         | 4      | 96.36               | 1.84              | -7.12               | -11.85           |
| Ground PP_colored       | 1      | 86.83               | -3.33             | -8.15               | -19.54           |
|                         | 2      | 89.41               | -1.97             | -7.75               | -17.08           |
|                         | 3      | 89.40               | -1.94             | -7.75               | -17.06           |
|                         | 4      | 89.16               | -2.33             | -8.10               | -18.12           |
| Ground PP_decoded_5min  | 1      | 92.20               | 0.65              | -5.03               | -9.25            |
|                         | 2      | 91.00               | 0.45              | -4.15               | -7.82            |
|                         | 3      | 91.05               | 0.27              | -4.57               | -8.78            |
|                         | 4      | 92.22               | 0.78              | -4.72               | -8.56            |
| Ground PP_decoded_60min | 1      | 92.22               | 0.83              | -4.62               | -8.32            |
|                         | 2      | 91.94               | 0.78              | -4.14               | -7.45            |
|                         | 3      | 92.33               | 0.93              | -4.44               | -7.89            |
|                         | 4      | 92.11               | 0.88              | -4.22               | -7.51            |

L\*  $\equiv$  Perceived lightness (perfect black = 0; perfect white = 100)

a\*  $\equiv$  Red/green balance; a\* > 0 (red  $\uparrow$ ); a\* = 0 (gray); a\* < 0 (green  $\uparrow$ )

b\*  $\equiv$  Yellow/blue balance; b\* > 0 (yellow  $\uparrow$ ); a\* = 0 (gray); b\* < 0 (blue  $\uparrow$ )

YI  $\equiv$  Yellowness Index (as YI  $\uparrow$ , yellowness  $\uparrow$ )

### **Economic impacts of the STRAP process including color removal**

Table S3. General parameters for the technoeconomic analysis.<sup>1,2</sup>

| <b>Parameter</b>                      | <b>Value</b>                                          |
|---------------------------------------|-------------------------------------------------------|
| Lifetime (years)                      | 20                                                    |
| Interest rate (%)                     | 10                                                    |
| Income tax rate (%)                   | 25                                                    |
| Depreciation method                   | MACRS                                                 |
| Plant operability per year (hours)    | 8,000                                                 |
| Lang factor                           | 3.63                                                  |
| ISBL costs                            | Lang Factor multiplied by the equipment purchase cost |
| Chemical Engineering Plant Cost Index | 776.9                                                 |

Table S4. Installed equipment cost for a 5,292 ton/year plant to produce decolored PP from face masks.<sup>3</sup>

| <b>Equipment</b>                       | <b>Installed Cost (USD)</b> |
|----------------------------------------|-----------------------------|
| Shredder                               | 232,582                     |
| Tanks                                  | 1,924,927                   |
| Vessels                                | 249,969                     |
| Filters                                | 2,982,158                   |
| Pumps                                  | 139,341                     |
| Extruder                               | 6,292,230                   |
| Heat Exchangers                        | 483,283                     |
| Dryers                                 | 5,571,297                   |
| Distillation column                    | 313,427                     |
| Grinder                                | 196,025                     |
| <b>Total installed equipment costs</b> | <b>18,385,240</b>           |

Table S5. Capital cost (CAPEX) for a 5,292 ton/year plant to produce decolored PP from face masks.

| <b>Category</b>                              | <b>Cost (USD)</b> |
|----------------------------------------------|-------------------|
| ISBL costs (total installed equipment costs) | 18,385,240        |
| OSBL costs (30% of ISBL)                     | 5,515,572         |
| Engineering cost (15% of the ISBL plus OSBL) | 3,585,122         |
| Contingency cost (20% of the ISBL plus OSBL) | 4,780,162         |
| <b>Total capital cost</b>                    | <b>32,266,096</b> |

Table S6. Fixed operating cost for a 5,292 ton/year plant to produce decolored PP from face masks.

| <b>Category</b>                       | <b>Cost (USD/year)</b> |
|---------------------------------------|------------------------|
| Operator salaries                     | 208,050                |
| Benefits and overhead (50% of salary) | 104,025                |
| Maintenance (3% of CAPEX)             | 967,983                |
| Insurance (0.7% of CAPEX)             | 225,863                |
| <b>Total fixed operating costs</b>    | <b>1,505,921</b>       |

Table S7. Variable operating costs for a 5,292 ton/year plant to produce decolored PP from face masks.

| <b>Category</b>               | <b>Unitary cost</b>             | <b>Cost (USD/year)</b> |
|-------------------------------|---------------------------------|------------------------|
| Electricity                   | 0.07 USD/kWh                    | 360,160                |
| Natural gas                   | 0.016 USD/kWh                   | 181,524                |
| Low-pressure steam            | $1.79 \times 10^{-6}$<br>USD/kJ | 20,960                 |
| Medium-pressure steam         | $2.32 \times 10^{-6}$<br>USD/kJ | 9,120                  |
| Cooling water                 | $3.43 \times 10^{-7}$<br>USD/kJ | 1,040                  |
| Cooling agent (chilled water) | $5 \times 10^{-6}$ USD/kJ       | 153,440                |
| Cooling agent (chilled brine) | $8.15 \times 10^{-6}$<br>USD/kJ | 134,080                |
| Cooling agent (propane)       | $1.32 \times 10^{-5}$<br>USD/kJ | 37,120                 |

|                                       |             |                |
|---------------------------------------|-------------|----------------|
| Toluene (99.97% of recovery)          | 0.85 USD/kg | 19,194         |
| DMAc (99.98% of recovery)             | 2.55 USD/kg | 30,568         |
| <b>Total variable operating costs</b> |             | <b>947,206</b> |

Table S8. Revenue for a 5,292 ton/year plant to produce decolored PP from face masks.

| PP production (kg/year) | Selling price (USD/kg) <sup>4</sup> | Revenue (USD/year) |
|-------------------------|-------------------------------------|--------------------|
| 3,952,160               | 2.52                                | 9,959,443          |
| <b>Total revenue</b>    |                                     | <b>9,959,443</b>   |

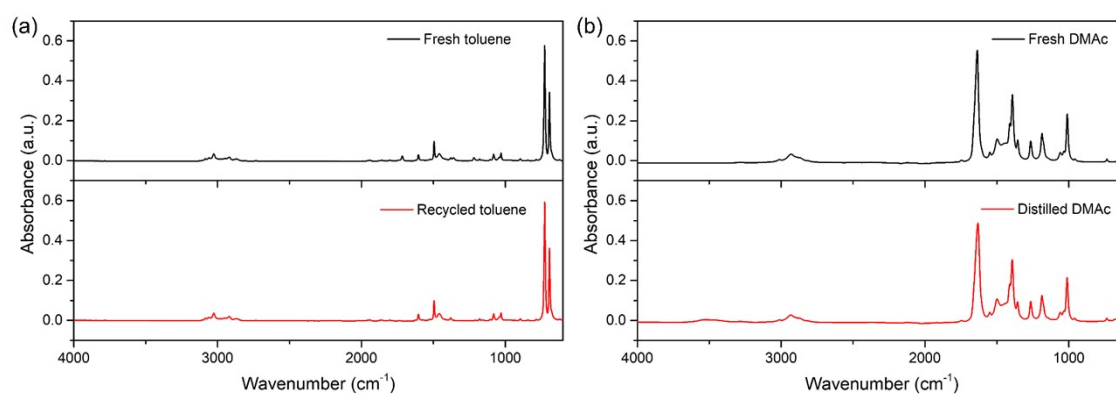

Figure S5. ATR-FTIR spectra of (a) fresh toluene and recycled toluene from stream No.13 and (b) fresh DMAc and distilled DMAc from stream No.26.

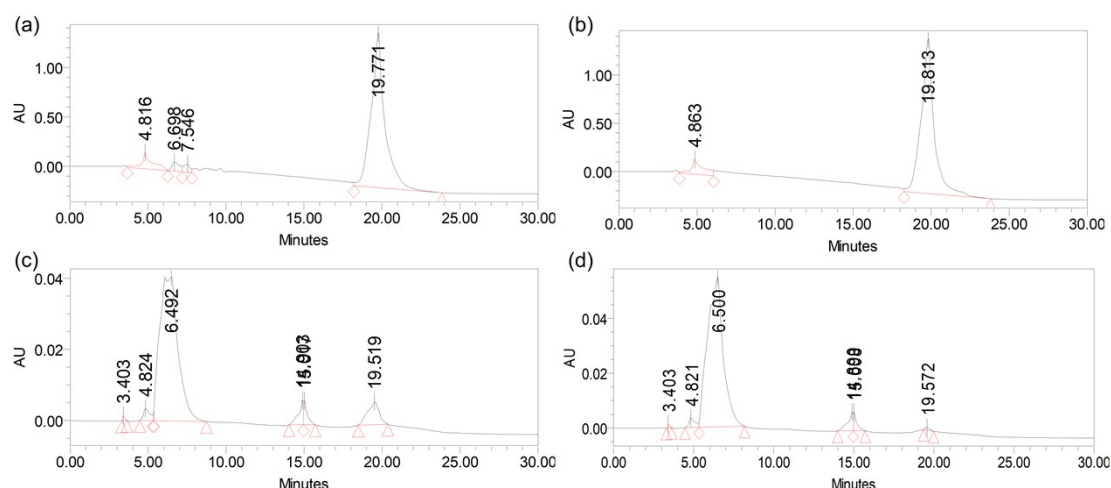

Figure S6. HPLC analysis of (a) fresh toluene, (b) and recycled toluene from stream No.13, (c) fresh DMAc, and (d) distilled DMAc from stream No.26.



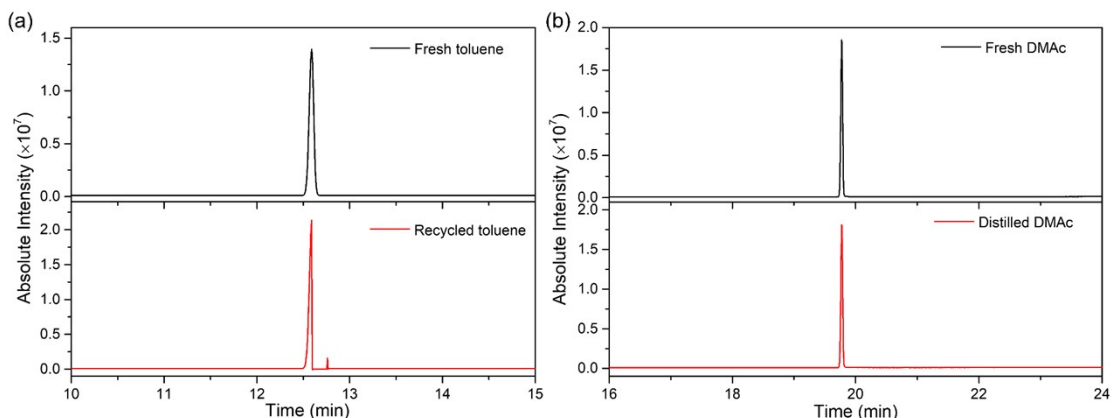

Figure S7. GC-MS spectra of (a) fresh toluene and recycled toluene from stream No.13 and (b) fresh DMAc and distilled DMAc from stream No.26.

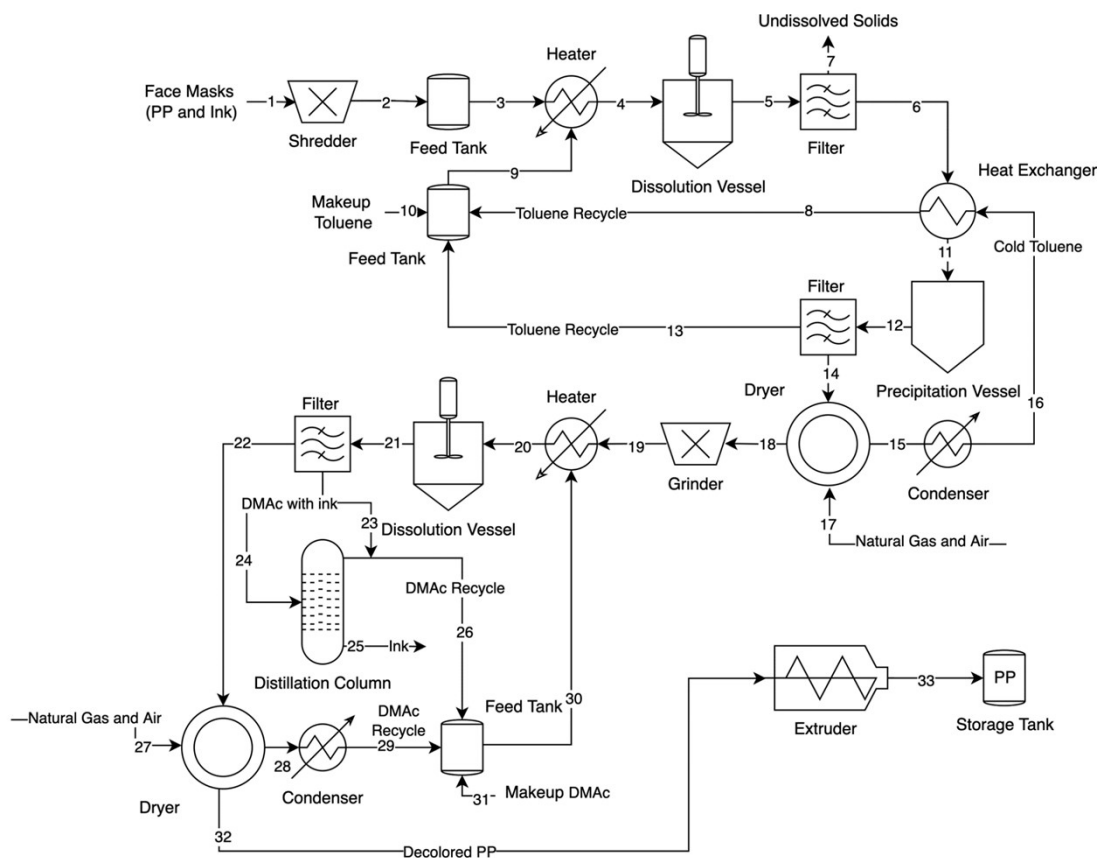

Figure S8. Process flow diagram for the recovery of decolored PP in face masks using the STRAP technology. The numbers in each line denote the stream number.

Table S9. Stream list and mass balance for a 5,292 ton/year decolored PP plant.

| <b>Stream Number</b>        | <b>1</b>  | <b>2</b>  | <b>3</b>  | <b>4</b>  | <b>5</b>  | <b>6</b>  | <b>7</b>  |
|-----------------------------|-----------|-----------|-----------|-----------|-----------|-----------|-----------|
| Temperature (°C)            | 25        | 25        | 25        | 110       | 110       | 110       | 110       |
| Component Flow Rate (kg/hr) |           |           |           |           |           |           |           |
| Face masks (PP and ink)     | 662       | 662       | 662       | 662       | 662       | 496       | 0         |
| Toluene                     | 0         | 0         | 0         | 9923      | 9923      | 9923      | 0         |
| Undissolved solids          | 0         | 0         | 0         | 0         | 0         | 0         | 166       |
| <b>Stream Number</b>        | <b>8</b>  | <b>9</b>  | <b>10</b> | <b>11</b> | <b>12</b> | <b>13</b> | <b>14</b> |
| Temperature (°C)            | 68        | 25        | 25        | 60        | 60        | 60        | 60        |
| Component Flow Rate (kg/hr) |           |           |           |           |           |           |           |
| Face masks (PP and ink)     | 0         | 0         | 0         | 496       | 496       | 0         | 496       |
| Toluene                     | 5575      | 9923      | 2         | 9923      | 9923      | 4346      | 5577      |
| <b>Stream Number</b>        | <b>15</b> | <b>16</b> | <b>17</b> | <b>18</b> | <b>19</b> | <b>20</b> | <b>21</b> |
| Temperature (°C)            | 110.6     | -37       | 25        | 110.6     | 110.6     | 115       | 115       |
| Component Flow Rate (kg/hr) |           |           |           |           |           |           |           |
| Face masks (PP and ink)     | 0         | 0         | 0         | 496       | 496       | 496       | 496       |
| Toluene                     | 5577      | 5575      | 0         | 0         | 0         | 0         | 0         |
| DMAc                        | 0         | 0         | 0         | 0         | 0         | 7443      | 7443      |
| Natural gas                 | 0         | 0         | 76        | 0         | 0         | 0         | 0         |
| <b>Stream Number</b>        | <b>22</b> | <b>23</b> | <b>24</b> | <b>25</b> | <b>26</b> | <b>27</b> | <b>28</b> |
| Temperature (°C)            | 115       | 115       | 115       | 151       | 90        | 25        | 165       |
| Component Flow Rate (kg/hr) |           |           |           |           |           |           |           |
| PP                          | 494       | 0         | 0         | 0         | 0         | 0         | 0         |
| Ink                         | 0         | 1.8       | 0.2       | 0.2       | 1.8       | 0         | 0         |
| DMAc                        | 1489      | 5359      | 595       | 1         | 5953      | 0         | 1489      |
| Natural gas                 | 0         | 0         | 0         | 0         | 0         | 28        | 0         |
| <b>Stream Number</b>        | <b>29</b> | <b>30</b> | <b>31</b> | <b>32</b> | <b>33</b> |           |           |
| Temperature (°C)            | -37       | 90        | 25        | 165       | 165       |           |           |
| Component Flow Rate (kg/hr) |           |           |           |           |           |           |           |
| PP                          | 0         | 0         | 0         | 494       | 494       |           |           |

|             |      |      |   |   |   |
|-------------|------|------|---|---|---|
| Ink         | 0    | 1.8  | 0 | 0 | 0 |
| DMAc        | 1489 | 7443 | 1 | 0 | 0 |
| Natural gas | 0    | 0    | 0 | 0 | 0 |

## Economic and environmental impacts of the STRAP process without color removal

### Technoeconomic Analysis

We performed a technoeconomic analysis (TEA) based on the collected experimental data of the process without the color removal to analyze its economic feasibility. Figure S9 shows the process flow diagram indicating the main equipment units and the input (face masks and toluene) and output (colored polypropylene) streams. Here, we can see the general steps of the process. First, the face masks are shredded and the stream together with the toluene stream are heated and mixed in the dissolution vessel. This mixture is filtered and cooled down before fed to the precipitation vessel. After this vessel, the mixture is filtered again. The liquid toluene stream is recycled and the other stream with polypropylene (PP) and toluene is dried to finally have a solid stream of PP and a gas stream of toluene. The toluene stream is condensed, and the resulting liquid stream of cold toluene is used as a cooling agent in the heat exchanger to reduce utilities costs; after, this toluene stream is also recycled. The solid PP stream is sent to the extruder and storage tank.

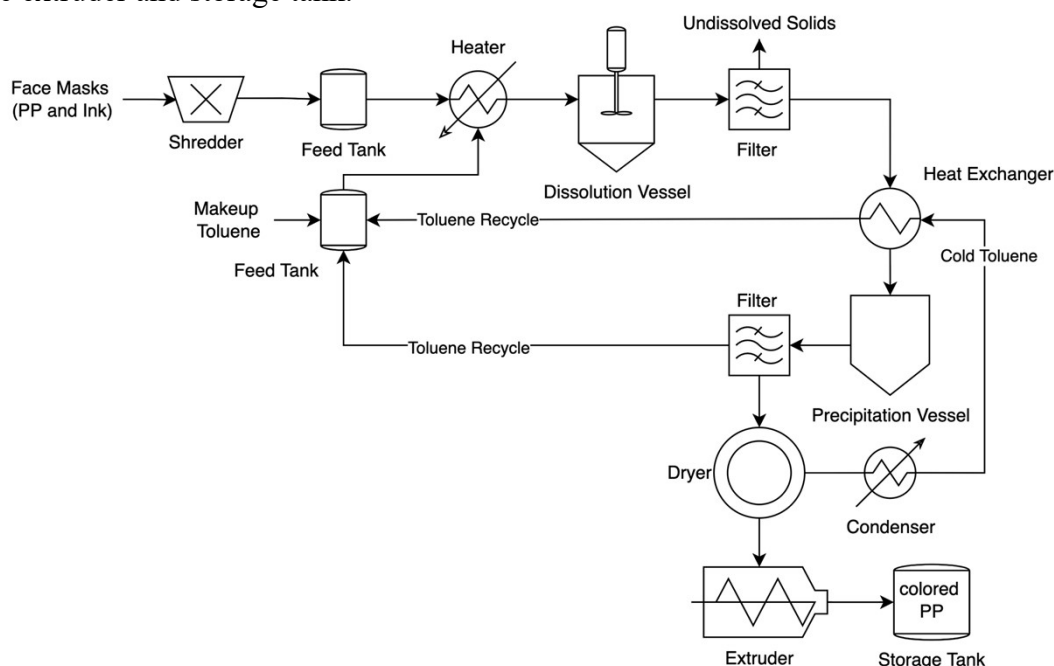

Figure S9. Process flow diagram for the recovery of colored PP in face masks using the STRAP technology (without color removal process).

Mass and energy balances were used to estimate the capital and operating costs of the process. We calculated the minimum selling price (MSP) of the PP for a plant capacity of 5,292 tons per year. We performed the process design and TEA using the open-source platform BioSTEAM. We consider 99.97% of solvent recovery for the toluene.

Other assumptions can be found in the Table S3. For the processing capacity of 5,292 tons per year, we found that the MSP of the colored PP was 1.42 USD/kg. This price is comparable to the average market values of virgin PP and the price of post-consumer PP (0.94-2.52 USD/kg).<sup>4, 5</sup> The total capital investment was 24.7 million USD, and the operating cost was 1.87 million USD per year. The detailed capital and operating costs are reported in the following Tables.

Table S10. Installed equipment cost for a 5,292 ton/year plant to produce colored PP from face masks.<sup>3</sup>

| <b>Equipment</b>                       | <b>Installed Cost (USD)</b> |
|----------------------------------------|-----------------------------|
| Shredder                               | 232,582                     |
| Tanks                                  | 1,367,924                   |
| Vessels                                | 186,492                     |
| Filters                                | 2,018,891                   |
| Pumps                                  | 104,802                     |
| Extruder                               | 6,307,385                   |
| Heat Exchangers                        | 354,697                     |
| Dryers                                 | 3,504,888                   |
| <b>Total installed equipment costs</b> | <b>14,077,661</b>           |

Table S11. Capital cost (CAPEX) for a 5,292 ton/year plant to produce colored PP from face masks.

| <b>Category</b>                              | <b>Cost (USD)</b> |
|----------------------------------------------|-------------------|
| ISBL costs (total installed equipment costs) | 14,077,661        |
| OSBL costs (30% of ISBL)                     | 4,223,298         |
| Engineering cost (15% of the ISBL plus OSBL) | 2,745,144         |
| Contingency cost (20% of the ISBL plus OSBL) | 3,660,192         |
| <b>Total capital cost</b>                    | <b>24,706,295</b> |

Table S12. Fixed operating cost for a 5,292 ton/year plant to produce colored PP from face masks.

| <b>Category</b>                       | <b>Cost (USD/year)</b> |
|---------------------------------------|------------------------|
| Operator salaries                     | 208,050                |
| Benefits and overhead (50% of salary) | 104,025                |
| Maintenance (3% of CAPEX)             | 741,189                |
| Insurance (0.7% of CAPEX)             | 172,944                |
| <b>Total fixed operating costs</b>    | <b>1,226,208</b>       |

Table S13. Variable operating costs for a 5,292 ton/year plant to produce colored PP from face masks.

| <b>Category</b>                       | <b>Unitary cost</b>          | <b>Cost (USD/year)</b> |
|---------------------------------------|------------------------------|------------------------|
| Electricity                           | 0.07 USD/kWh                 | 259,360                |
| Natural gas                           | 0.016 USD/kWh                | 133,388                |
| Low-pressure steam                    | $1.79 \times 10^{-6}$ USD/kJ | 15,440                 |
| Cooling agent (chilled water)         | $5 \times 10^{-6}$ USD/kJ    | 153,440                |
| Cooling agent (chilled brine)         | $8.15 \times 10^{-6}$ USD/kJ | 30,000                 |
| Cooling agent (propane)               | $1.32 \times 10^{-5}$ USD/kJ | 37,120                 |
| Toluene (99.97% of recovery)          | 0.85 USD/kg                  | 19,194                 |
| <b>Total variable operating costs</b> |                              | <b>647,942</b>         |

Table S14. Revenue for a 5,292 ton/year plant to produce colored PP from face masks. We assume that the selling price will be lower than the price of the decolored PP.

| <b>PP production (kg/year)</b> | <b>Selling price (USD/kg)<sup>4</sup></b> | <b>Revenue (USD/year)</b> |
|--------------------------------|-------------------------------------------|---------------------------|
| 3,952,160                      | 1.50                                      | 5,928,240                 |
| <b>Total revenue</b>           |                                           | <b>5,928,240</b>          |

The sensitivity analysis for selected parameters is presented in Figure S10. We estimated the MSP when the value of these parameters increases or decreases by 30%. We can see that the MSP is sensitive to the interest rate.

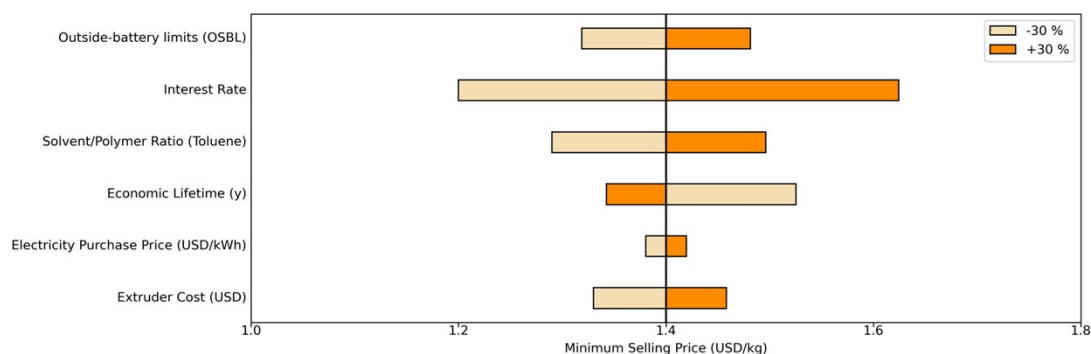

Figure S10. Sensitivity analysis for important parameters of the process without color removal.

The sensitivity analysis for different processing capacities to evaluate the impact of the economies of scale on the process is presented in Figure S11. We observe that after 7,000 tons per year, the MSP of the PP produced in the STRAP process is around half the maximum market value of the virgin resin and the price of post-consumer PP (0.94-2.52 USD/kg).<sup>4, 5</sup> These results demonstrate that the STRAP process without color removal is economically feasible, and that this technology could be installed at a large scale to recover the PP of the facemasks waste.

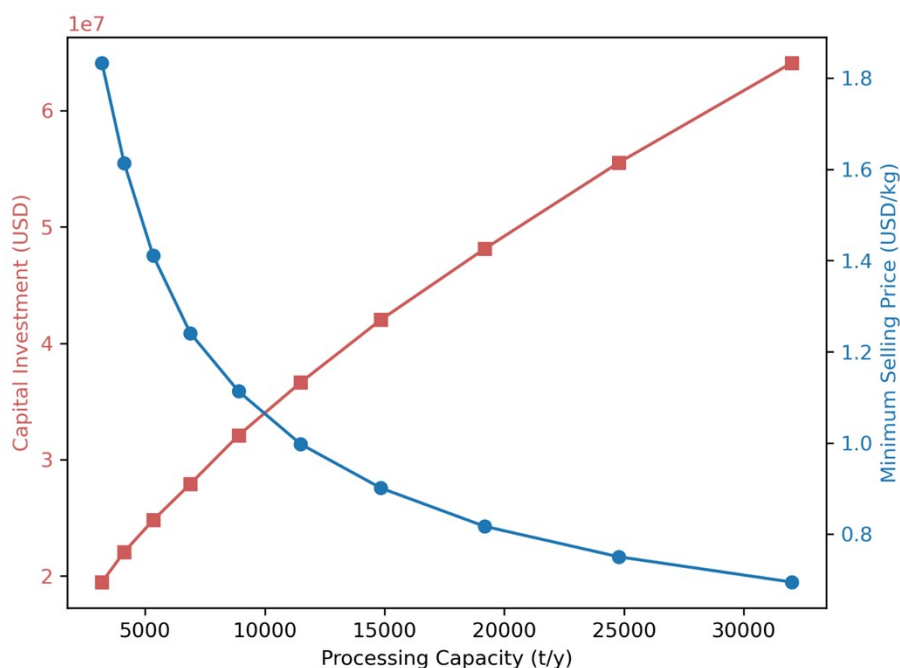

Figure S11. Sensitivity analysis for economies of scale of the STRAP process without color removal.

### Environmental impact analysis

We analyzed the environmental impacts of the STRAP process without color removal using a life cycle assessment methodology and a product perspective (similarly to the environmental analysis that includes color removal). The functional unit considered is the production of 1 kg of PP. Therefore, we compare the environmental impacts of

producing 1 kg of PP from traditional pathways with producing 1 kg of PP through the STRAP process. In Figure S12, we can see that the total impacts of the STRAP process without color removal (0.57 kg CO<sub>2</sub> eq./kg PP) are lower than the impacts of the virgin resin production (2.07 kg CO<sub>2</sub> eq./kg PP). Specifically, around 72% less emissions are generated in the STRAP process. The LCA data for solvents and for the virgin production of polypropylene are taken from the Ecoinvent 3.6 cut-off by classification database using the Environmental Footprint method. Data for the STRAP process utilities (steam, electricity, and cooling agents), as well as the transportation of commodities, are taken from the Environmental Footprint database.

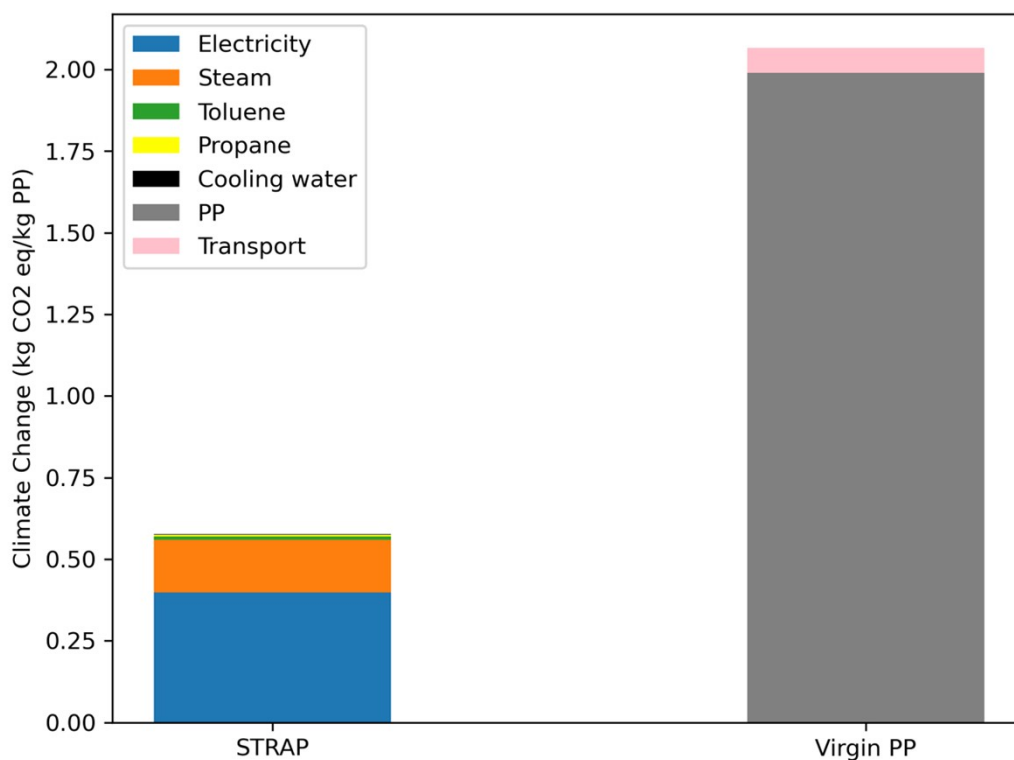

Figure S12. Climate change impact of producing colored PP via the STRAP process in comparison with virgin PP.

## References

1. D. C. Habgood, A. F. Hoadley and L. Zhang, *Chemical Engineering Research and Design*, 2015, **102**, 57-68.
2. G. Towler and R. Sinnott, *Chemical engineering design: Principles, practice and economics of plant and process design*, Butterworth-Heinemann, 2021.
3. Y. Cortes-Peña, D. Kumar, V. Singh and J. S. Guest, *ACS Sustainable Chemistry & Engineering*, 2020, **8**, 3302-3310.
4. S. P. Global, *POLYMERSCAN. Americas polymer spot price assessments*, 2021.
5. Statista, Price of polypropylene worldwide from 2017 to 2022, <https://www.statista.com/statistics/1171084/price-polypropylene-forecastglobally> (accessed June 16, 2022).
